# Supplementary material for: Glutaredoxin mediated redox effects of coenzyme Q10 treatment in type 1 and type 2 diabetes patients
Source: PubMed Central journal article supplement (PMC4737908; doi:10.1016/j.bbacli.2015.06.001), 2015-06-10
Supplement: mmc1.pdf [file mmc1.pdf]

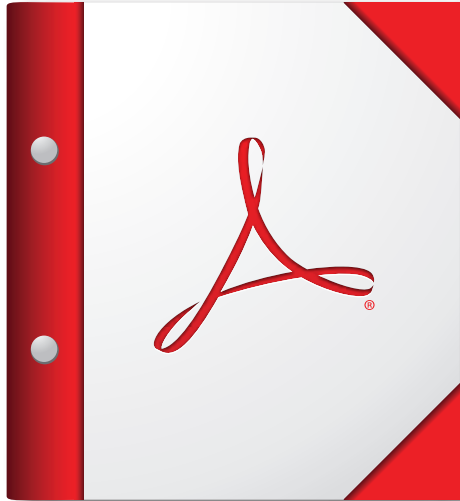

**For the best experience, open this PDF portfolio in  
Acrobat 9 or Adobe Reader 9, or later.**

[Get Adobe Reader Now!](#)
